# Supplementary material for: Use of Machine Learning to Estimate the Per-Protocol Effect of Low-Dose Aspirin on Pregnancy Outcomes: A Secondary Analysis of a Randomized Clinical Trial
Source: PubMed Central journal article supplement (PMC8908068; doi:10.1001/jamanetworkopen.2021.43414), 2022-03-09
Supplement: jamanetwopen-e2143414-s002.pdf [file jamanetwopen-e2143414-s002.pdf]

## Supplementary Online Content

Zhong Y, Brooks MM, Kennedy EH, Bodnar LM, Naimi AI. Use of machine learning to estimate the per-protocol effect of low-dose aspirin on pregnancy outcomes: a secondary analysis of a randomized clinical trial. *JAMA Netw Open*. 2022;5(3):e2143414. doi:10.1001/jamanetworkopen.2021.43414

**eTable.** Sensitivity Analyses of the Effects of Low-Dose Aspirin on hCG-Detected Pregnancy Among Women Adhering to the Assigned Treatment: 5 of 7 Pills per Week Over at Least 80% of Person-Weeks of Follow-up Using Different Estimation Methods

**eFigure.** Sensitivity Analyses of the Effects of Low-Dose Aspirin on hCG Conception Using Different Adherence Levels and Estimation Methods

**eMethods.** R Code for Per-Protocol Effect Estimation

This supplementary material has been provided by the authors to give readers additional information about their work.

**eTable.** Sensitivity Analyses of the Effects of Low-Dose Aspirin on hCG-Detected Pregnancy Among Women Adhering to the Assigned Treatment: 5 of 7 Pills per Week Over at Least 80% of Person-Weeks of Follow-up Using Different Estimation Methods

| Method                                                                                            | Machine Learning | Est. SE |       | RD     |       | RR    |       |       |       |
|---------------------------------------------------------------------------------------------------|------------------|---------|-------|--------|-------|-------|-------|-------|-------|
|                                                                                                   |                  |         |       | LCL    | UCL   | Est.  | SE    | LCL   | UCL   |
| Intention-to-treat                                                                                | No               | 0.043   | 0.027 | -0.011 | 0.096 | 1.069 | 0.043 | 0.982 | 1.163 |
| <b>Per-protocol analysis adjusted for baseline covariates</b>                                     |                  |         |       |        |       |       |       |       |       |
| AIPW                                                                                              | Yes              | 0.080   | 0.028 | 0.025  | 0.136 | 1.107 | 0.036 | 1.032 | 1.188 |
| TMLE                                                                                              | Yes              | 0.078   | 0.025 | 0.030  | 0.126 | 1.104 | 0.031 | 1.038 | 1.174 |
| G-computation                                                                                     | No               | 0.073   | 0.027 | 0.019  | 0.125 | 1.097 | 0.035 | 1.024 | 1.173 |
| IPW                                                                                               | No               | 0.075   | 0.028 | 0.019  | 0.130 | 1.099 | 0.036 | 1.024 | 1.180 |
| <b>Per-protocol analysis adjusted for baseline covariates and post-randomization confounders*</b> |                  |         |       |        |       |       |       |       |       |
| AIPW                                                                                              | Yes              | 0.084   | 0.029 | 0.028  | 0.140 | 1.113 | 0.037 | 1.036 | 1.196 |
| TMLE                                                                                              | Yes              | 0.078   | 0.025 | 0.030  | 0.126 | 1.104 | 0.031 | 1.038 | 1.174 |
| G-computation                                                                                     | No               | 0.073   | 0.027 | 0.020  | 0.125 | 1.097 | 0.034 | 1.024 | 1.172 |
| IPW                                                                                               | No               | 0.073   | 0.028 | 0.018  | 0.128 | 1.097 | 0.036 | 1.022 | 1.177 |
| <b>Unadjusted per-protocol analysis</b>                                                           |                  |         |       |        |       |       |       |       |       |
| Unadjusted                                                                                        | No               | 0.078   | 0.028 | 0.023  | 0.132 | 1.103 | 0.035 | 1.029 | 1.183 |

AIPW: Augmented Inverse Probability Weighting; TMLE: Targeted Maximum Likelihood Estimation; IPW: Inverse Probability Weighting  
 \* Adjusted for unusual bleeding [ $\geq 1/7$  days (20%) per week over  $\geq 50\%$  person-week] and nausea and/or vomiting [ $\geq 1/7$  days (20%) per week over  $\geq 20\%$  person-week]. **CAUTION: adjusting for post-randomization confounders in a time-fixed setting (i.e., collapsing time-varying information into a dichotomous variable) is inappropriate.**

**Figure.** Sensitivity Analyses of the Effects of Low-Dose Aspirin on hCG Conception Using Different Adherence Levels and Estimation Methods

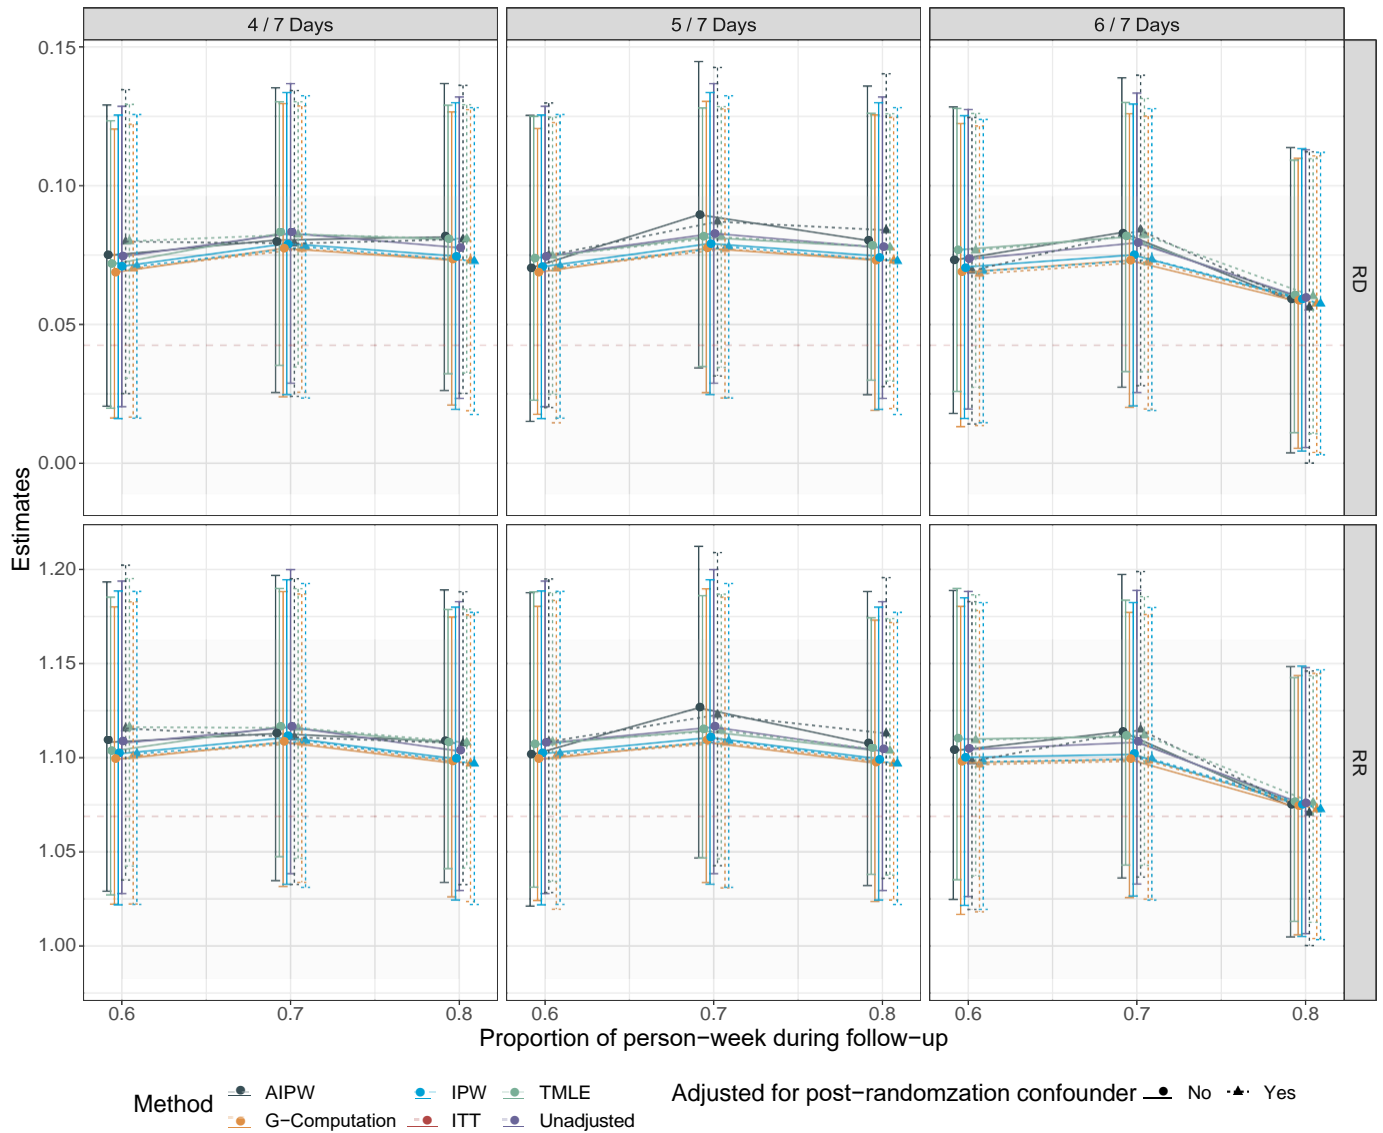

AIPW: Augmented Inverse Probability Weighting

TMLE: Targeted Maximum Likelihood Estimation

IPW: Inverse Probability Weighting

Post-randomization confounder: unusual bleeding [ $\geq 1/7$ days(20%) per week over  $\geq 50\%$  person-week] and nausea and/or vomiting [ $\geq 7$ days(20%) per week over  $20\%$  person-week]. **CAUTION: adjusting for post-randomization confounders in a time-fixed setting (i.e., collapsing time-varying information into a dichotomous variable) is inappropriate.**

---

## eMethods. R code for Per-Protocol Effect Estimation

### Setup

#### Load necessary packages and dataset

```
packages <- c("tidyverse", "AIPW", "SuperLearner",
             "earth", "ranger", "xgboost")

for (package in packages) {
  if (!require(package, character.only=T, quietly=T)) {
    install.packages(package, repos='http://lib.stat.cmu.edu/R/CRAN')
  }
}

#read dataset
eager_analysis <- read_csv("eager_pp_df_20200615.csv")
```

### Intention-to-treat

```
# unadjusted estimates
get_all_est <- function(x){
  mat <- as.matrix(x)
  p1 <- mat[2,2]/sum(mat[2,])
  p0 <- mat[1,2]/sum(mat[1,])
  res <- data.frame(
    #Est./ SE
    RD = c(p1-p0,
           sqrt(p1*(1-p1)/sum(mat[2,])+p0*(1-p0)/sum(mat[1,]))),
    logRR = c( log(p1/p0),
              sqrt((1-p1)/mat[2,2]+(1-p0)/mat[1,2])),
    logOR = c( log((p1/(1-p1))/(p0/(1-p0))),
              sqrt(1/mat[2,2]+1/mat[1,2]+1/mat[1,1]+1/mat[2,1]))
  ) %>%
  rbind(., .[1,] - 1.96 * .[2,], .[1,] + 1.96 * .[2,]) %>%
  bind_cols(N = sum(mat),
           Param = c("Est.", "SE", "LCL", "UCL"),
           Method = "Unadj")
  return(res)
}

#ITT estimates
itt <- get_all_est(table(eager_analysis$treatment,eager_analysis$conception))
itt
```

### Per-protocol

#### Machine Learning + AIPW Adjusting for Baseline Covariates

```
# Set seeds
set.seed(123)

# Define learners for stacking machine learning via SuperLearner
earth_learner <- create.Learner("SL.earth", tune=list(degree=c(2,3)))
ranger_learner <- create.Learner("SL.ranger", tune=list(min.node.size = c(30),
                                                       num.trees=c(500),
                                                       max.depth=c(2,3)))
xgboost_learner <- create.Learner("SL.xgboost", tune=list(minobspernode = c(30),
```

```

ntrees=c(500),
max_depth=c(2,3),
subsample=c(1)))

sl.lib <- c("SL.glm", "SL.glm.interaction",
           earth_learner$names,ranger_learner$names, xgboost_learner$names)

# Subset dataset to those adhered to the protocol
df <- eager_analysis %>% filter(weeks_0.7_pt_0.8==1)

# select baseline covariates
bl_cov <- df %>%
  select(income_1:hsCRP) %>%
  as.data.frame()

# AIPW estimation via AIPW package
aipw_fit1 <- AIPW$new(Y=df$conception,
                    A=df$treatment,
                    W=bl_cov,
                    g.SL.library = sl.lib,
                    Q.SL.library = sl.lib,
                    k_split = 10,
                    verbose = TRUE)$

fit()$
summary(g.bound=0.025)$
# check positivity
plot.p_score()

```

### Machine Learning + AIPW Adjusting for Baseline Covariates + Post-randomization Confounders

```

# select post-randomization confounders
postRand_confounder <- df %>%
  select(bleed_0.2_pt_0.5,nausea_0.2_pt_0.2) %>%
  as.data.frame()

# AIPW estimator via AIPW package
aipw_fit2 <- AIPW$new(Y=df$conception,
                    A=df$treatment,
                    W=cbind(bl_cov,postRand_confounder),
                    g.SL.library = sl.lib,
                    Q.SL.library = sl.lib,
                    k_split = 10,
                    verbose = TRUE)$

fit()$
summary(g.bound=0.025)$
# check positivity
plot.p_score()

```
