# Supplementary material for: Use of Machine Learning to Estimate the Per-Protocol Effect of Low-Dose Aspirin on Pregnancy Outcomes: A Secondary Analysis of a Randomized Clinical Trial
Source: PubMed Central journal article supplement (PMC8908068; doi:10.1001/jamanetworkopen.2021.43414), 2022-03-09
Supplement: jamanetwopen-e2143414-s003.pdf [file jamanetwopen-e2143414-s003.pdf]

## Data Sharing Statement

Zhong. Use of Machine Learning to Estimate the Per-Protocol Effect of Low-Dose Aspirin on Pregnancy Outcomes. *JAMA Netw Open*. Published March 09, 2022.

doi:10.1001/jamanetworkopen.2021.43414

### Data

**Data available:** No

### Additional Information

**Explanation for why data not available:** Trial data will be made accessible in an electronic repository after completion of the study's analytical phases. The data, along with a set of guidelines for researchers applying for use of the data, will be posted to a data sharing site: Eunice Kennedy Shriver National Institute of Child Health and Human Development Data and Specimen Hub (<https://dash.nichd.nih.gov>).
